# Supplementary material
Source: publisher figshare collection journal article supplement (https://gsapubs.figshare.com/ndownloader/files/35911379)
Supplement: Supplementary file 1 [file 35911379]

## Sheet: Palaeotological data
Distribution of charophyte species from the ZK-3 borehole in the Pingyi Basin.
Depth (m)/Species	Micrichara cristata	Feistiella anluensis	Sphaerochara jacobii	Lychnothamnus aff. vectensis	Lamprothamnium ellipticum	Peckichara varians
0.7						1
1						1
1.2						1
1.3						1
2						1
2.6						1
3						1
3.7						1
4						1
6.28						1
6.5			1
8.5	1		1			1
9.28						1
9.8			1			1
10.08						1
10.2						1
10.48						1
10.6						1
10.85						1
11.18			1			1
11.4				1		1
11.5						1
11.88			1
14						1
16.5						1
17.1						1
17.7						1
18.3			1			1
27				1
30				1
40	1
40.4	1				1
41.5	1		1	1
41.6				1
42.1	1		1	1	1
42.15	1			1*
42.18	1
42.5	1		1*		1
84.55		1
Distribution of charophyte species from the ZK-2 borehole in the Jiaolai Basin.
Depth (m)/Species	Tolypella grambastii	Peckichara praecursoria	Microchara cristata	Microchara prolixa	Chara changzhouensis	Lamprothamnium ellipticum	Nodosochara (Turbochara) specialis	Lychnothamnus aff. vectensis	Lychnothamnus lanpingensis
1.5									20
2.5									8
9									6
10									21
11					1
16			8		2
17			1
17.9		5	1
18.8		4	3		15
19.2					2
22				2	1
22.5	16			15	8			6
23	9				4
23.5	10		2		4			6
24.4	3		2	1	6			2
39.7	1
40.95	6	9	2		3	2
42.65				1		1
48					1
49.15	1		1		1			1*
49.75	1	3
55.7					1
58.3				1
58.7				1
73							30
74.5							1
Distribution of ostracod species from the ZK-3 borehole in the Pingyi Basin.
Depth (m)/Species	Eucypris sp.	Cypridea (Cypridea) pingyiensis	Mongolocypris distributa	Ziziphocypris simakovi	Darwinula sp.	Metacypris sp.	Metcypris changzhouensis	Paracandona sp.	Lineocypris sp.	Cyclocypris sp.	Candona sp.	Talicypridea reticulata	Talicypridea sp.	Lineocypris bianqiaoensis	Cypridea sp.	Paracandona subeuplectella	Cypridea cavernosa	Candona declivis
1	1										1
6.5	1					1					1
8.5																	1
9.8	1			1			1			1					1		1	1
11.8	1							1
18.3														1		1
25.2														1
26.1														1
27											1			1	1
28.1		1												1
29.2														1
30		1						1	1
39.4								1	1
40.4		1		1						1	1	1	1
41.5		1	1			1		1	1
42.1		1	1				1	1	1
42.5		1*	1	1	1	1
54.1	1
Depth (m)/Species	Paracandona electclis	Candoniella sp.
1
6.5		1
8.5
9.8	1
11.8
18.3
25.2
26.1
27
28.1
29.2
30
39.4
40.4
41.5
42.1
42.5
54.1
* representing first appearance of species during Hg spikes interval, with increasing range-through diversity

## Sheet: G50016
Li, S., et al., 2022, Mercury evidence of Deccan volcanism driving the Latest Maastrichtian warming event: Geology, v. 50, https://doi.org/10.1130/G50016.1
